# Supplementary material
Source: PubMed Central journal article supplement (PMC3347674)
Supplement: supp_2011.047316_2011.047316.Jain_suppl.pdf [file supp_2011.047316_2011.047316.Jain_suppl.pdf]

## Th17 and non-Th17 interleukin-17-expressing cells in chronic lymphocytic leukemia: delineation, distribution, and clinical relevance

Preetesh Jain,<sup>1,2\*</sup> Mohammad Javdan,<sup>1\*</sup> Franziska K. Feger,<sup>1</sup> Pui Yan Chiu,<sup>1</sup> Cristina Sison,<sup>1</sup> Rajendra N. Damle,<sup>1,3</sup> Tawfiqul A. Bhuiya,<sup>4</sup> Filiz Sen,<sup>4</sup> Lynne V. Abruzzo,<sup>5</sup> Jan A. Burger,<sup>6</sup> Andreas Rosenwald,<sup>7</sup> Steven L. Allen,<sup>1,3,8</sup> Jonathan E. Kolitz,<sup>1,3,8</sup> Kanti R. Rai,<sup>1,3,8</sup> Nicholas Chiorazzi,<sup>1,3,8,9</sup> and Barbara Sherry<sup>1,3,8</sup>

<sup>1</sup>The Feinstein Institute for Medical Research, North Shore-Long Island Jewish (LIJ) Health System, Manhasset, NY, USA; <sup>2</sup>Elmezzzi Graduate School of Molecular Medicine, North Shore-LIJ Health System, Manhasset, NY, USA; Departments of <sup>3</sup>Medicine and <sup>4</sup>Anatomical Pathology, North Shore University Hospital and Long Island Jewish Medical Center, North Shore-LIJ Health System, Manhasset and New Hyde Park, NY, USA; <sup>5</sup>Department of Hematopathology, Unit 350, The UT M.D. Anderson Cancer Center, Houston, TX, USA; <sup>6</sup>Department of Leukemia, Unit 428, The UT M.D. Anderson Cancer Center, Houston, TX, USA; <sup>7</sup>Institute of Pathology, University of Wuerzburg, Wuerzburg, Germany; <sup>8</sup>Departments of Medicine and of Molecular Medicine, Hofstra North Shore-LIJ School of Medicine, Hempstead, NY, USA, and <sup>9</sup>Departments of Medicine and Cell Biology, Albert Einstein College of Medicine, Bronx, NY, USA

Citation: Jain P, Javdan M, Feger FK, Chiu PY, Sison C, Damle RN, Bhuiya TA, Sen F, Abruzzo LV, Burger JA, Rosenwald A, Allen SL, Kolitz JE, Rai KR, Chiorazzi N, and Sherry B. Th17 and non-Th17 interleukin-17-expressing cells in chronic lymphocytic leukemia: delineation, distribution, and clinical relevance. *Haematologica* 2012;97(4):599-607. doi:10.3324/haematol.2011.047316

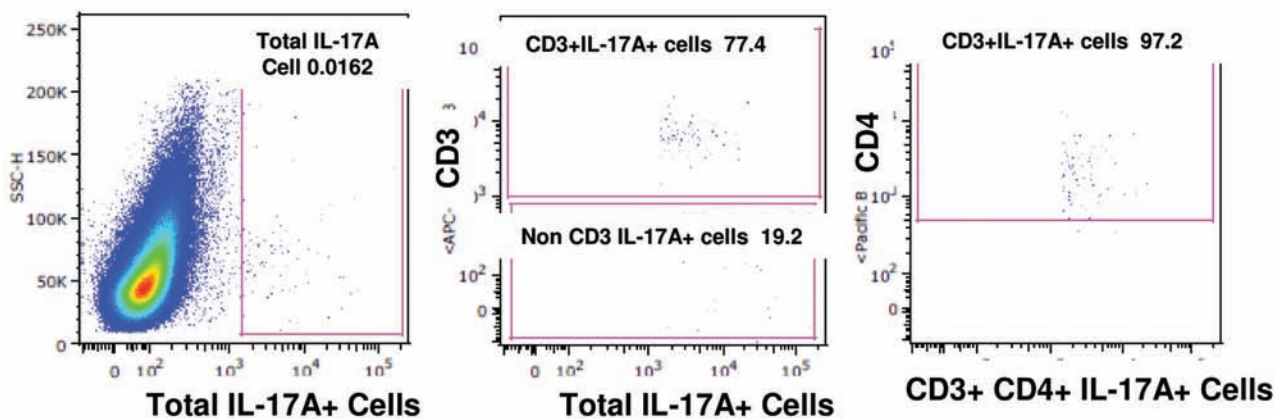

Online Supplementary Figure S1. Total IL-17A-containing cells in spleen suspensions from CLL patients. The figure shows a representative dot plot of the distribution of Th17 and non-Th17 cells in spleen suspensions from CLL patients.

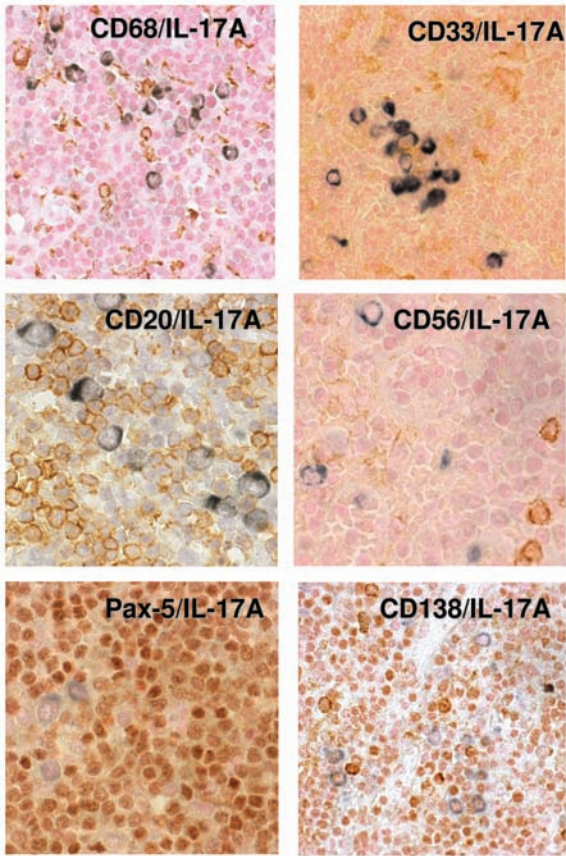

**Online Supplementary Figure S2.** Phenotype of IL-17A-containing cells in spleens from CLL patients. IL-17A<sup>+</sup> cells do not express CD68, CD33, CD20, CD56, CD138 and Pax-5. All images were obtained from double-stained slides and were obtained at 600X magnification using a 60X oil immersion objective lens; images were taken by light microscopy (Zeiss Axiovert 200M, Axiovision 4 software) at room temperature.

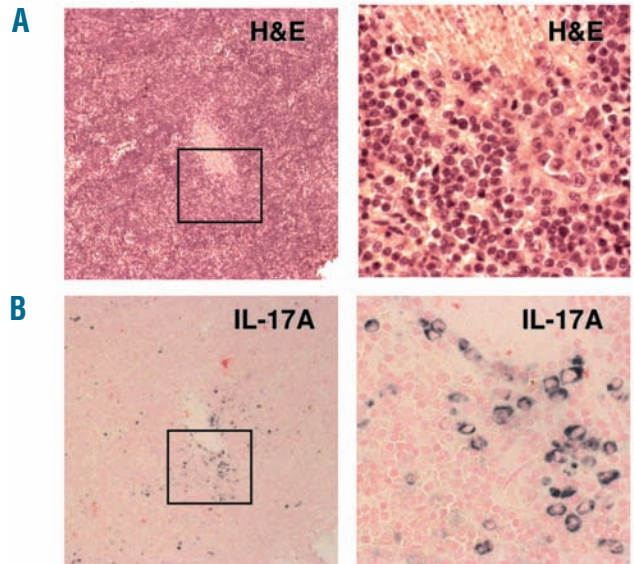

**Online Supplementary Figure S3.** Localization of IL-17A-expressing cells in CLL spleen. (A) H&E staining of CLL spleen showing the distribution of cells (see box) at low magnification (100X) and high magnification (600X) using 60X oil immersion objective lens. (B) The same area with (single staining) high (X600) magnification view of CLL spleen pointing out the IL-17A cells. Note that these cells are mostly in clusters in and around sinusoids and vessel walls. All images were obtained at 600X magnification using a 60X oil immersion objective lens at room temperature.

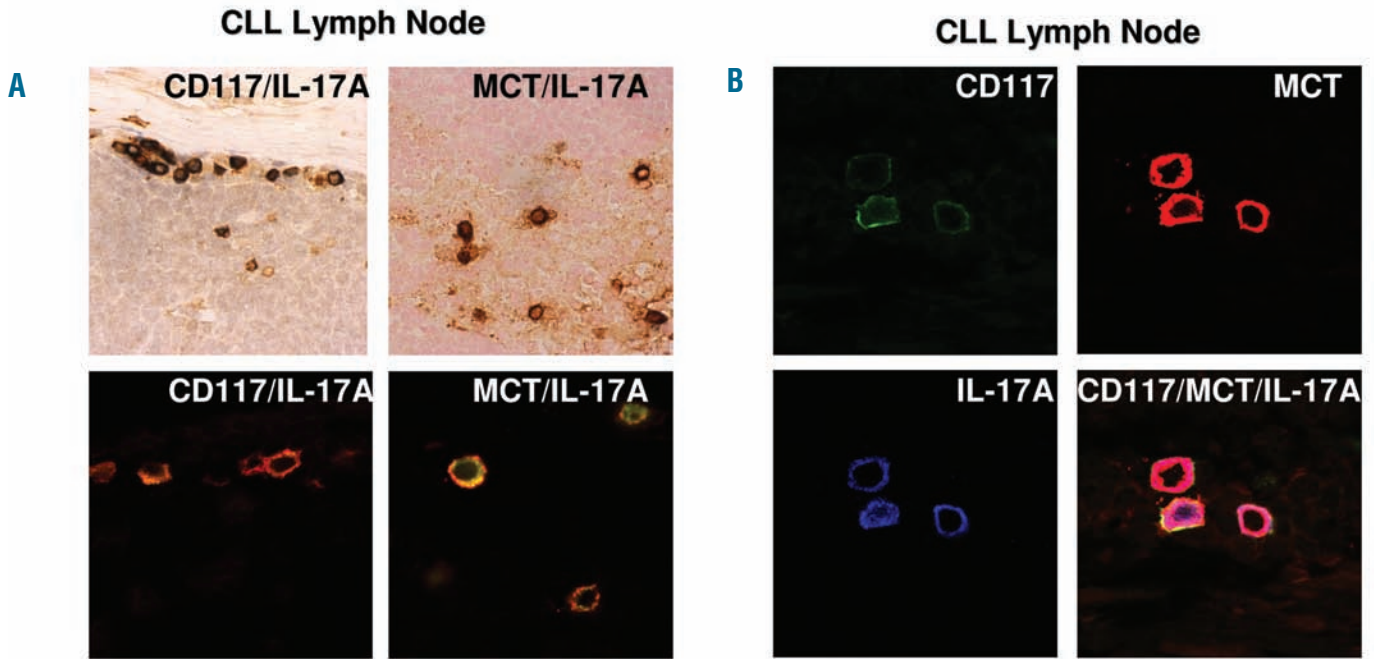

**Online Supplementary Figure S4.** IL-17A<sup>+</sup> mast cells in CLL lymph nodes. (A) Immunohistochemistry showing all IL-17A-containing cells in CLL lymph nodes coexpress CD117 and MCT. (B) Co-expression of CD117 and MCT by IL-17A<sup>+</sup> cells in CLL lymph nodes by immunofluorescence suggests that they are mast cells and not the immature proliferating myeloid cells as seen in CLL spleens. All images were obtained at 600X magnification using a 60X oil immersion objective lens, with a light microscope (Zeiss Axiovert 200M, Axiovision 4 software) and confocal laser scanning biological microscope (Olympus Fluoview 300, Fluoview software) at room temperature.

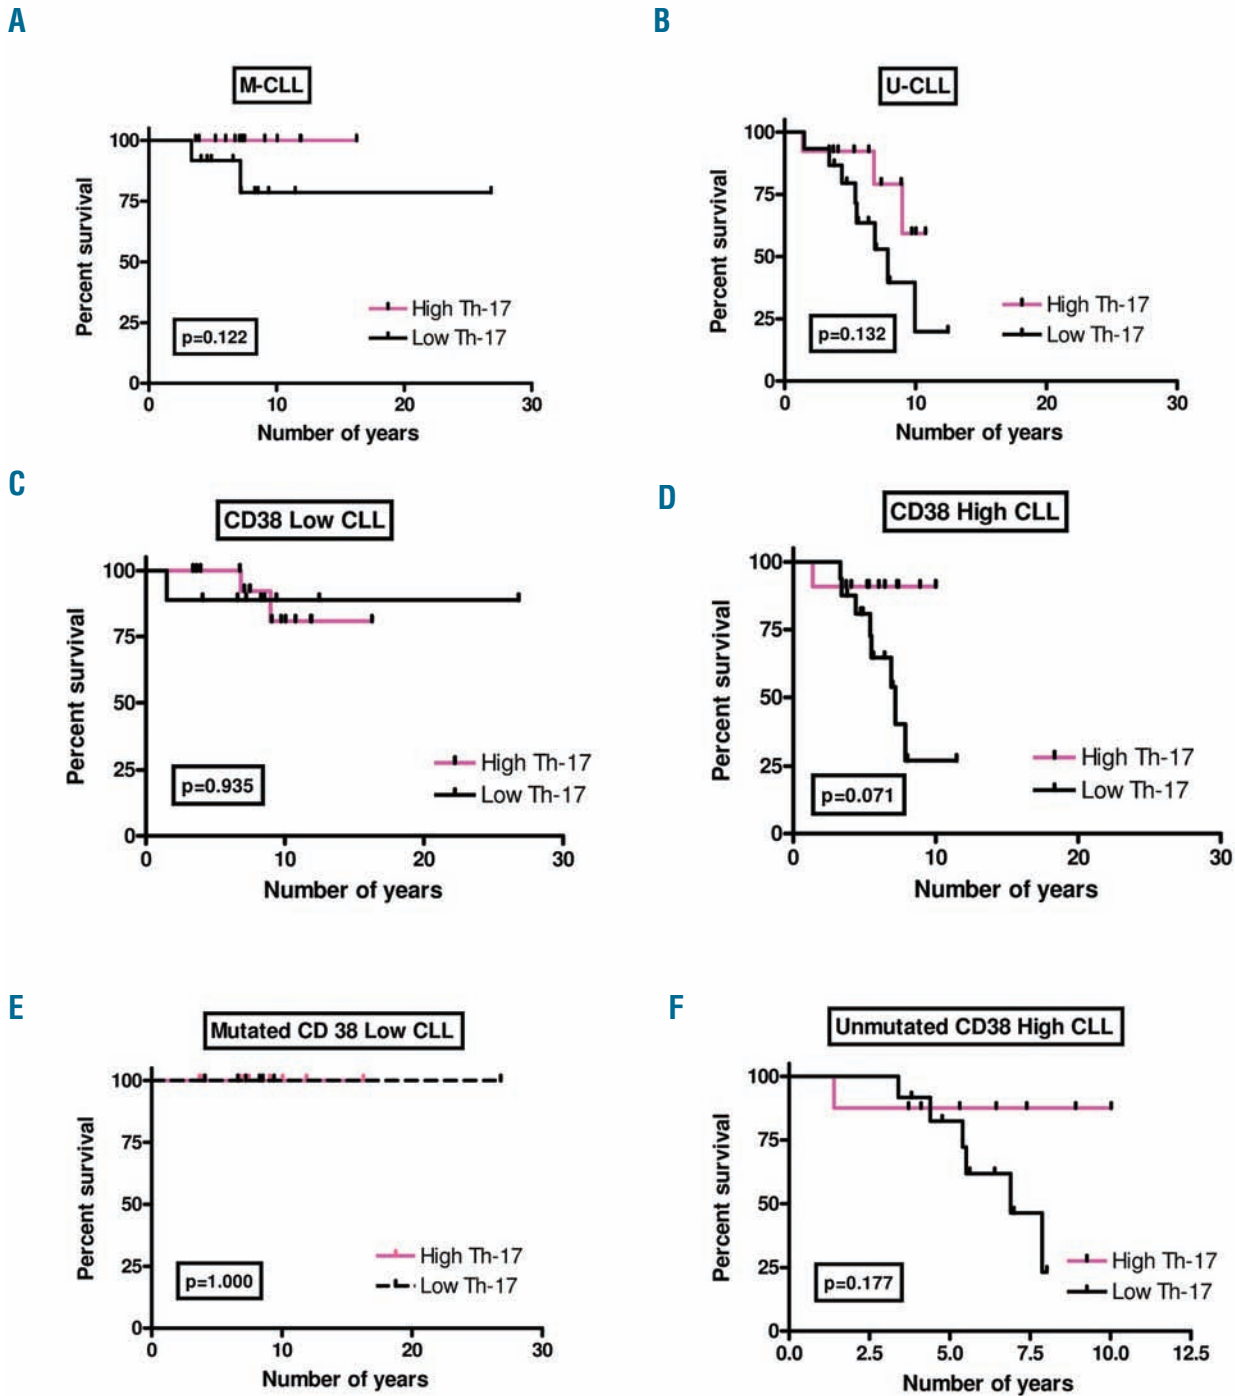

**Online Supplementary Figure S5.** Relationship between absolute numbers of circulating Th17 cells and prognostic markers in patients who were untreated at the time of blood collection. (A) Correlation of absolute numbers of Th17 cells with overall survival (OS) in M-CLL patients. M-CLL patients were divided into Th17<sup>Low</sup> (n=12) and Th17<sup>High</sup> (n=15) subgroups. Median survival for both M-CLL groups was not reached. (B) Correlation of absolute numbers of Th17 cells with survival in U-CLL patients. U-CLL patients were divided into Th17<sup>Low</sup> and Th17<sup>High</sup> subgroups. U-CLL patients with higher levels of Th17 cells (n=13; median OS not reached) lived longer than Th17<sup>Low</sup> U-CLL patients (n=15; median survival = 7.87 years;  $P=0.132$ ). (C) Correlation of absolute numbers of Th17 cells with survival in CD38<sup>Low</sup> CLL patients. CD38<sup>Low</sup> CLL patients were divided into Th17<sup>Low</sup> (n=9) and Th17<sup>High</sup> (n=17) subgroups. Median survival for both CD38<sup>Low</sup> CLL groups was not reached. (D) Correlation of absolute numbers of Th17 cells with survival in CD38<sup>High</sup> CLL patients. CD38<sup>High</sup> CLL patients were divided into Th17<sup>Low</sup> and Th17<sup>High</sup> subgroups. CD38<sup>High</sup> CLL patients with higher levels of Th17 cells (n=11; median OS not reached) had a longer outcome than Th17<sup>Low</sup> U-CLL patients (n=16; median survival = 7.18 years;  $P=0.071$ ). (E) Correlation of absolute numbers of Th17 cells with survival in M/CD38<sup>Low</sup> CLL patients. M/CD38<sup>Low</sup> CLL patients were divided into Th17<sup>Low</sup> and Th17<sup>High</sup> subgroups. The survival curve for M/CD38<sup>Low</sup> CLL patients with higher levels of Th17 cells (n=12; median OS not reached) was identical to the survival curve for Th17<sup>Low</sup> M/CD38<sup>Low</sup> patients (n=5; median survival = 7.76 years). The dotted black line indicates the Th17<sup>Low</sup> subgroup. (F) Correlation of absolute numbers of Th17 cells with survival in U/CD38<sup>High</sup> CLL patients. U/CD38<sup>High</sup> CLL patients were divided into Th17<sup>Low</sup> and Th17<sup>High</sup> groups. U/CD38<sup>High</sup> CLL patients with higher levels of Th17 cells (n=8; median OS not reached) had a longer survival than Th17<sup>Low</sup> U/CD38<sup>High</sup> patients (n=12; median survival = 6.89 years;  $P=0.177$ ).

**Online Supplementary Table S1. Clinical and laboratory characteristics of CLL patients listed in order of increasing absolute number of circulating Th17 (CD3<sup>+</sup>CD4<sup>+</sup>IL-17A<sup>+</sup>) cells.**

| CLL Number | IGHV Mutation Status | CD38 level | Fluorescence <i>in situ</i> hybridization (FISH)* | Rai stage | Duration of disease (years) | Treated (T) or untreated (NT) at time of sample collection | Time-to-first treatment (years) ** | % Th17 cells <sup>+</sup> | Absolute number of Th17 cells <sup>++</sup> |
|------------|----------------------|------------|---------------------------------------------------|-----------|-----------------------------|------------------------------------------------------------|------------------------------------|---------------------------|---------------------------------------------|
| 0514       | NA                   | Low        | NA                                                | 2         | 19.14#                      | T                                                          | 0.25                               | 0                         | 0                                           |
| 0569       | U                    | High       | Normal                                            | 2         | 5.51                        | NT                                                         | 5.38                               | 0                         | 0                                           |
| 0692       | M                    | High       | Trisomy 12                                        | 0         | 11.47#                      | NT                                                         | 8.02                               | 0                         | 0                                           |
| 0797       | M                    | High       | Trisomy 12                                        | 0         | 7.18                        | NT                                                         | 5.92                               | 0                         | 0                                           |
| 0967       | M                    | High       | Normal                                            | 2         | 4.53#                       | NT                                                         | NT                                 | 0                         | 0                                           |
| 0973       | U                    | High       | del17p,del11q                                     | 4         | 4.39                        | NT                                                         | 2.35                               | 0                         | 0                                           |
| 1090       | M                    | Low        | Normal                                            | 0         | 4.10#                       | NT                                                         | NT                                 | 0.020                     | 0                                           |
| 1278       | U                    | High       | Trisomy 12                                        | 2         | 6.89                        | NT                                                         | 5.55                               | 0                         | 0                                           |
| 0717       | U                    | Low        | NA                                                | 1         | 1.50                        | NT                                                         | 0.14                               | 0.480                     | 0.1                                         |
| 1041       | U                    | High       | Normal                                            | 3         | 14.1                        | T                                                          | 4.93                               | 0.1                       | 0.2                                         |
| 0394       | U                    | High       | del 11q                                           | 3         | 8.70                        | T                                                          | 3.76                               | 0.015                     | 0.2                                         |
| 0710       | M                    | High       | Normal                                            | 3         | 3.32                        | NT                                                         | 0.55                               | 0.371                     | 0.3                                         |
| 0404       | M                    | Low        | NA                                                | 0         | 26.82#                      | NT                                                         | NT                                 | 0.2                       | 0.3                                         |
| 0156       | U                    | NA         | del13q,del11q                                     | 3         | 9.96                        | NT                                                         | 5.67                               | 0.09                      | 0.5                                         |
| 1013       | U                    | High       | Trisomy 12                                        | 0         | 4.76#                       | NT                                                         | NT                                 | 0.120                     | 0.5                                         |
| 0776       | M                    | Low        | Trisomy 12                                        | 4         | 9.40                        | NT                                                         | 5.05                               | 0.2                       | 0.5                                         |
| 0321       | U                    | Low        | Trisomy 12                                        | 0         | 12.48#                      | NT                                                         | NT                                 | 0.084                     | 0.6                                         |
| 1140       | U                    | High       | del13q                                            | 2         | 3.80#                       | NT                                                         | 1.09                               | 0.137                     | 1.0                                         |
| 0815       | U                    | High       | del11q                                            | 1         | 5.40                        | NT                                                         | 3.08                               | 0.1                       | 1.1                                         |
| 1191       | U                    | High       | Trisomy 12,del11q,del6q                           | 0         | 6.40#                       | NT                                                         | 3.01                               | 0.160                     | 1.3                                         |
| 1156       | U                    | High       | del13q,del17p                                     | 1         | 3.40                        | NT                                                         | 2.09                               | 0.059                     | 1.3                                         |
| 0847       | U                    | High       | NA                                                | 1         | 5.62#                       | NT                                                         | 1.11                               | 0.4                       | 1.5                                         |
| 1381       | M                    | Low        | NA                                                | 1         | 8.29#                       | NT                                                         | NT                                 | 0.402                     | 1.7                                         |
| 1071       | U                    | NA         | del13q                                            | 2         | 4.55#                       | NT                                                         | 2.94                               | 0.4                       | 2.4                                         |
| 0631       | U                    | High       | del11q                                            | 0         | 6.99#                       | NT                                                         | NT                                 | 0.222                     | 2.5                                         |
| 0865       | U                    | High       | NA                                                | 1         | 7.87                        | NT                                                         | 4.56                               | 0.2                       | 2.9                                         |
| 0515       | U                    | High       | Normal                                            | 2         | 8.02                        | NT                                                         | 4.89                               | 0.5                       | 3.6                                         |
| 0700       | M                    | Low        | del 13q                                           | 0         | 6.61#                       | NT                                                         | NT                                 | 0.839                     | 4.0                                         |
| 1167       | M                    | Low        | del13q                                            | 0         | 7.22#                       | NT                                                         | 5.34                               | 0.620                     | 4.6                                         |
| 0445       | M                    | Low        | Normal                                            | 0         | 8.54#                       | NT                                                         | NT                                 | 2.4                       | 4.6                                         |
| 1153       | U                    | High       | Normal                                            | 0         | 4.46                        | T                                                          | 2.58                               | 0.589                     | 5.0                                         |
| 1016       | U                    | High       | NA                                                | 3         | 3.85                        | T                                                          | 0.20                               | 0.479                     | 5.2                                         |
| 0705       | U                    | High       | del17p,del13q                                     | 4         | 1.71                        | T                                                          | 0.08                               | 1.030                     | 5.4                                         |
| 1028       | M                    | Low        | NA                                                | 1         | 9.07#                       | NT                                                         | 4.50                               | 0.650                     | 5.8                                         |
| 1178       | M                    | Low        | del13q                                            | 0         | 3.94#                       | NT                                                         | NT                                 | 0.590                     | 6.7                                         |
| 1380       | U                    | Low        | del13q                                            | 1         | 3.40#                       | NT                                                         | NT                                 | 1.290                     | 7.1                                         |
| 0373       | U                    | Low        | del13q                                            | 2         | 9.73#                       | NT                                                         | NT                                 | 1.5                       | 7.3                                         |
| 1163       | U                    | High       | del11q                                            | 1         | 3.73#                       | NT                                                         | NT                                 | 1.047                     | 7.5                                         |
| 0721       | U                    | Low        | Trisomy 12                                        | 3         | 12.57#                      | T                                                          | 3.55                               | 1.720                     | 7.6                                         |
| 0712       | M                    | Low        | NA                                                | 1         | 25.84#                      | T                                                          | 9.90                               | 0.550                     | 7.8                                         |
| 0678       | M                    | Low        | NA                                                | 1         | 6.76#                       | NT                                                         | 2.15                               | 0.4                       | 7.9                                         |
| 1104       | U                    | High       | Fusion 14q and Trisomy 12                         | 1         | 4.10#                       | NT                                                         | NT                                 | 0.690                     | 8.7                                         |
| 0896       | U                    | High       | NA                                                | 0         | 5.31#                       | NT                                                         | 0.88                               | 0.730                     | 9.6                                         |
| 0745       | U                    | High       | del 13q,del 11q                                   | 1         | 6.44#                       | NT                                                         | 5.76                               | 2.3                       | 10.6                                        |
| 1099       | M                    | Low        | del13q                                            | 0         | 10.06#                      | NT                                                         | NT                                 | 0.800                     | 11.4                                        |
| 1025       | U                    | High       | del13 q                                           | 0         | 11.09#                      | T                                                          | 2.80                               | 0.775                     | 12.2                                        |
| 1008       | U                    | High       | Trisomy 12,del11q                                 | 4         | 13.10                       | T                                                          | 1.97                               | 0.768                     | 14.4                                        |
| 0699       | M                    | Low        | del13q                                            | 1         | 7.47#                       | NT                                                         | NT                                 | 2.010                     | 14.9                                        |
| 1042       | M                    | Low        | NA                                                | 0         | 7.10#                       | NT                                                         | NT                                 | 0.591                     | 15.1                                        |
| 1168       | M                    | Low        | del13q                                            | 1         | 11.87#                      | NT                                                         | 8.92                               | 1.346                     | 16.3                                        |

continued on next page

continued from previous page

| CLL Number | IGHV Mutation Status | CD38 level | Fluorescence <i>in situ</i> hybridization (FISH)* | Rai stage | Duration of disease (years) | Treated (T) or untreated (NT) at time of sample collection | Time-to-first treatment (years) ** | % Th17 cells* | Absolute number of Th17 cells** |
|------------|----------------------|------------|---------------------------------------------------|-----------|-----------------------------|------------------------------------------------------------|------------------------------------|---------------|---------------------------------|
| 0974       | U                    | High       | del 13q,del 11q                                   | 0         | 7.39#                       | NT                                                         | NT                                 | 2.800         | 17.9                            |
| 1180       | M                    | Low        | Normal                                            | 1         | 3.65#                       | NT                                                         | NT                                 | 0.620         | 18.6                            |
| 0834       | U                    | Low        | del13q                                            | 1         | 10.78#                      | NT                                                         | 8.82                               | 0.6           | 20.4                            |
| 0726       | M                    | High       | del13 q                                           | 0         | 7.29#                       | NT                                                         | 3.46                               | 2.710         | 21.7                            |
| 1283       | U                    | High       | del17p,del13q,del11q                              | 3         | 1.40                        | NT                                                         | NT                                 | 2.3           | 24.1                            |
| 1187       | M                    | Low        | del13q                                            | 1         | 7.10#                       | NT                                                         | 4.50                               | 1.905         | 24.4                            |
| 0936       | M                    | High       | NA                                                | 1         | 5.21#                       | NT                                                         | 3.24                               | 2.4           | 24.6                            |
| 0879       | M                    | Low        | Normal                                            | 3         | 16.27#                      | NT                                                         | 13.32                              | 3.550         | 25.2                            |
| 0784       | U                    | High       | NA                                                | 4         | 8.91#                       | NT                                                         | 2.79                               | 1.3           | 25.8                            |
| 0230       | U                    | Low        | NA                                                | 1         | 6.82                        | NT                                                         | 3.37                               | 0.915         | 27.2                            |
| 0781       | M                    | High       | NA                                                | 0         | 6.03#                       | NT                                                         | 0.06                               | 1             | 28                              |
| 0424       | U                    | High       | NA                                                | 1         | 10.02#                      | NT                                                         | 1.11                               | 1.420         | 34.0                            |
| 0724       | M                    | Low        | del13 q                                           | 1         | 7.49#                       | NT                                                         | NT                                 | 2.494         | 34.9                            |
| 1396       | U                    | Low        | del17p                                            | 2         | 4.10#                       | T                                                          | 1.81                               | 1.5           | 39.4                            |
| 0276       | M                    | Low        | del13q                                            | 1         | 11.91#                      | NT                                                         | NT                                 | 1.445         | 41.1                            |
| 0439       | U                    | Low        | del6q,Trisomy 12                                  | 2         | 8.98                        | NT                                                         | 6.48                               | 1.3           | 99.9                            |

NA: Not available; NT: Not treated; \*Percent of CD3<sup>+</sup>CD4<sup>+</sup> cells containing intracellular IL-17A (Th17 cells) by flow cytometry. \*\*Absolute number of Th17 cells in blood (per mm<sup>3</sup>) for each patient was determined according to the formula: [ALC (per mm<sup>3</sup>)] x [% CD3 positive MNC] x [% CD4 positive CD3 cells] x [%IL-17 positive CD4 cells]. ALC means absolute lymphocyte count and MNC means mononuclear cells. Red text identifies patients in the Th17<sup>high</sup> group (≥5.6). Cut off value of 5.6 is the median. \*Probes used in FISH analysis were p53 for del17p, ATM for del11q and D13S319 for del13q. \*Patients who are alive. \*\*Time-to-first-treatment was measured as time of diagnosis until the time to start treatment in the patients who were treated and from the time of diagnosis until the time of patients' visit for the patients who were never treated.

Online Supplementary Table S2. Clinical features of CLL patients whose spleens were analyzed for IL-17A-expressing cells.

| CLL Spleen | M/U-CLL   | CD38 Low/High | FISH report                                       | Autoimmune associations (Yes/No) | Reason for splenectomy                                         | G-CSF treatment  | %Th17* |
|------------|-----------|---------------|---------------------------------------------------|----------------------------------|----------------------------------------------------------------|------------------|--------|
| 1          | UM (0%)   | High (53.4%)  | Normal                                            | No                               | Refractory pancytopenia                                        | Multiple courses | 2.3    |
| 2          | UM (0%)   | High (58.2%)  | del14q,del11q, del17p,p53 mutated (by sequencing) | No                               | Refractory pancytopenia                                        | Multiple courses | 0.0    |
| 3          | UM (0%)   | Low (0.8%)    | del17p alone                                      | No                               | Massive splenomegaly in elderly patient                        | None             | 0.1    |
| 4          | ND        | ND            | ND                                                | Possible                         | Massive splenomegaly, hypogammaglobulinemia, thrombocytopenia  | None             | 0.2    |
| 5          | M (5.97%) | Low (0.8%)    | Trisomy 12                                        | No                               | Multiple times treated, spleen removed due to splenic infarcts | Possible         | 0.7    |
| 6          | ND        | ND            | ND                                                | Yes                              | Evan's Syndrome                                                | None             | 0.4    |

\*Percent of CD3<sup>+</sup> cells coexpressing IL-17A (Th17) as determined by double immunofluorescence staining of formalin-fixed, paraffin-embedded spleen sections with anti-CD3 and anti-IL-17A antibodies. Numbers represent an average of results from 12 high power fields.

Online Supplementary Table S3. Antibodies used for immunohistochemistry and immunofluorescence analyses.

| Antibody           | Clone      | Source                       | Dilution |
|--------------------|------------|------------------------------|----------|
| CD3                | PS16       | Invitrogen                   | Neat     |
| CD4                | 1F6        | Novacastra                   | Neat     |
| CD13               | Polyclonal | Novus Biologicals            | 1:50     |
| CD14               | 7          | Novacastra                   | 1:100    |
| CD15               | Carb-3     | Dako                         | Neat     |
| CD20               | L26        | Dako                         | Neat     |
| CD21               | 1F8        | Dako                         | 1:25     |
| CD23               | MHM6       | Dako                         | 1:10     |
| CD31               | JC/70A     | Thermo Scientific            | Neat     |
| CD33               | PWS44      | Novacastra                   | 1:100    |
| CD38               | SPC32      | Novacastra                   | 1:50     |
| CD56               | 1B6        | Vector Laboratories          | 1:25     |
| CD68               | PG-M1      | Dako                         | Neat     |
| CD117              | c-kit      | Dako                         | 1:200    |
| CD123              | 6H6        | eBioscience                  | 1:10     |
| CD138              | B-A38      | AbDserotec                   | 1:50     |
| CD303              | Polyclonal | Novus Biologicals            | 1:25     |
| CD2AP              | Polyclonal | SIGMA                        | 1:50     |
| IL17A              | Polyclonal | Santa Cruz Biotechnology     | 1:25     |
| IL17A              | Polyclonal | R&D System                   | 1:25     |
| Pax5               | 24/Pax-5   | BD Transduction Laboratories | 1:25     |
| Ki-67              | MIB-1      | Dako                         | Neat     |
| Ki-67              | Polyclonal | Abcam                        | 1:25     |
| Myeloperoxidase    | Polyclonal | Thermo Scientific            | Neat     |
| Mast cell tryptase | AA1        | Dako                         | 1:200    |
| Stat3              | Polyclonal | Cell signaling               | 1:100    |
| Glycophorin A      | Monoclonal | Dako                         | 1:100    |
