# Supplementary material
Source: PubMed Central journal article supplement (PMC3347674)
Supplement: supp_2011.047316_2011_047316-Contributions.pdf [file supp_2011.047316_2011_047316-Contributions.pdf]

**Manuscript no. HAEMATOL/2011/047316 entitled “Th17 and non-Th17 IL-17-expressing cells in chronic lymphocytic leukemia: delineation, distribution, and clinical relevance”**

**Authors: Preetesh Jain, Mohammad Javdan, Franziska K. Feger, Pui Yan Chiu, Cristina Sison, Rajendra N. Damle, Tawfiqul A. Bhuiya, Filiz Sen, Lynne V. Abruzzo, Jan A. Burger, Andreas Rosenwald, Steven L. Allen, Jonathan E. Kolitz, Kanti R. Rai, Nicholas Chiorazzi, and Barbara Sherry**

**Information about the contributions of each person named as having participated in the study**

- 1) **Guarantor(s)**, i.e., person(s) who is (are) responsible for the integrity of the work as a whole:
- Preetesh Jain, The Feinstein Institute for Medical Research, Manhasset, NY; current address: MD Anderson, Leukemia Unit, Houston, TX; Email: [pjain@mdanderson.org](mailto:pjain@mdanderson.org)
  - Nicholas Chiorazzi, The Feinstein Institute for Medical Research, Manhasset, NY; Email: [nchizzi@nshs.edu](mailto:nchizzi@nshs.edu)
  - Barbara Sherry, The Feinstein Institute for Medical Research, Manhasset, NY; Email: [bsherry@nshs.edu](mailto:bsherry@nshs.edu)

According to the International Committee of Medical Journal Editors (ICMJE) ([http://www.icmje.org/ethical\\_1author.html](http://www.icmje.org/ethical_1author.html)): “Authorship credit should be based on: 1) substantial contributions to conception and design, acquisition of data, or analysis and interpretation of data; 2) drafting the article or revising it critically for important intellectual content; and 3) final approval of the version to be published. Authors should meet conditions 1, 2, and 3 ..... Acquisition of funding, collection of data, or general supervision of the research group alone does not constitute authorship”.

The guarantors of this manuscript confirm that all persons designated as authors qualify for authorship, and that each author has participated sufficiently in the work to take public responsibility for appropriate portions of the content.

2) **Authors who participated in the conception of the study:** Preetesh Jain, Nicholas Chiorazzi, Barbara Sherry

3) **Design & Methods.** The following authors were responsible for specific investigations

- Preetesh Jain was responsible for all investigations
- Nicholas Chiorazzi was responsible for all investigations
- Barbara Sherry was responsible for all investigations
- Mohammad Javdan was responsible for immunohistochemistry and immunofluorescence investigations

4) **Results.** The following authors were responsible for specific portions of the results, including figures and tables

- Preetesh Jain was responsible for all results, figures, and tables
- Barbara Sherry was responsible for all results, figures and tables
- Nicholas Chiorazzi was responsible for analysis and interpretation of all data
- Mohammad Javdan was responsible for IHC and IF data, Figures 2B-D and 3, and Supplemental Figures S2, S3, and S4
- Franziska Feger was responsible for IHC and IF data and Figure 2C and D
- Cristina Sison was responsible for statistical analysis of all data and for preparation of Figure 4 and Supplemental Figure S5
- Paulina Chiu was responsible for data analysis for Figures 1 and 4
- Rajendra Damle was responsible for data analysis for Supplementary Table 1

- Tawfiqul A. Bhuiya was responsible for evaluating spleen/LN immunohistochemistry slides
- Filiz Sen was responsible for evaluating spleen/LN immunohistochemistry slides
- Lynne V. Abruzzo was responsible for evaluating spleen/LN immunohistochemistry slides
- Jan A. Burger contributed valuable patient samples
- Andreas Rosenwald contributed valuable patient samples
- Steven L.Allen was responsible for collecting patient data and samples and doing clinical correlations for Figures 1 and 4
- Jonathan E. Kolitz was responsible for collecting patient data and samples and doing clinical correlations for Figures 1 and 4
- Kanti R. Rai was responsible for collecting patient data and samples and doing clinical correlations for Figures 1 and 4

5) **Writing the manuscript.** The following authors were responsible for writing the manuscript:

- Preetesh Jain
- Nicholas Chiorazzi
- Barbara Sherry
- Mohammad Javdan, Franziska K. Feger, Pui Yan Chiu, Cristina Sison, Rajendra N. Damle, Tawfiqul A. Bhuiya, Filiz Sen, Lynne V. Abruzzo, Jan A. Burger, Andreas Rosenwald, Steven L.Allen, Jonathan E. Kolitz, Kanti R. Rai were involved in critical manuscript revision

6) **Contributors Listed in Acknowledgments:**

Sophie Yancopoulos for her critical reading of the manuscript

Stella Stefanova for helping with flow cytometry

Tarush Kothari for providing valuable tissue samples

Funding: This work was supported by the Karches Foundation, the Prince Family Foundation, the Marks Foundation, the Jerome Levy Foundation, the Leon Levy Foundation, the Andrew and Mona Albert Fund, Inc., and the Joseph Eletto Leukemia Research Fund.
